# Supplementary material
Source: MDPI journal article supplement (https://www.mdpi.com/2673-7140/3/2/30)
Supplement: s1 [file s1]

**Table S1:** Meteorological data analysis in the sampling period

| Meteorological parameters | Studied sites |                 |                |
|---------------------------|---------------|-----------------|----------------|
|                           | Zaafrane (ZA) | Sal rocket (SR) | Boughzoul (BG) |
| <b>M</b>                  | 21,48167      | 21,45417        | 21,79083       |
| <b>m</b>                  | 8.923333      | 8.73            | 9.037917       |
| <b>T°moy</b>              | 15.2025       | 14.9075         | 15.41433       |
| <b>PP</b>                 | 20.99167      | 26.60283        | 17.25583       |
| <b>PP/T</b>               | 1.380804      | 1.784527        | 1.119467       |
| <b>K</b>                  | 13.80804      | 17.84527        | 11.19467       |
| <b>IDM</b>                | 13.31161      | 17.04399        | 10.87672       |

IDM: aridity index of De Martonne, K: hydrothermal coefficient of Sielianinov, PP/T: average of hygrometry; PP: cumulated of daily precipitation (mm), T: average of mean air temperatures (°C), M: maximum temperature in the sampled season. m: minimum temperature in the sampled season.

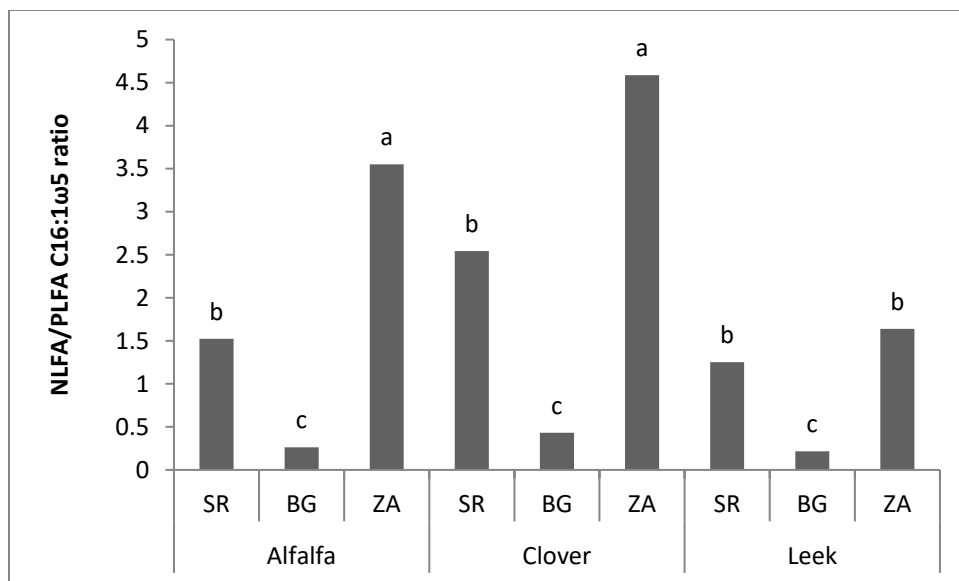

**Figure. S1:** NLFA/ PLFA C16:1ω5 ratio for the studied soils under the three host plants.

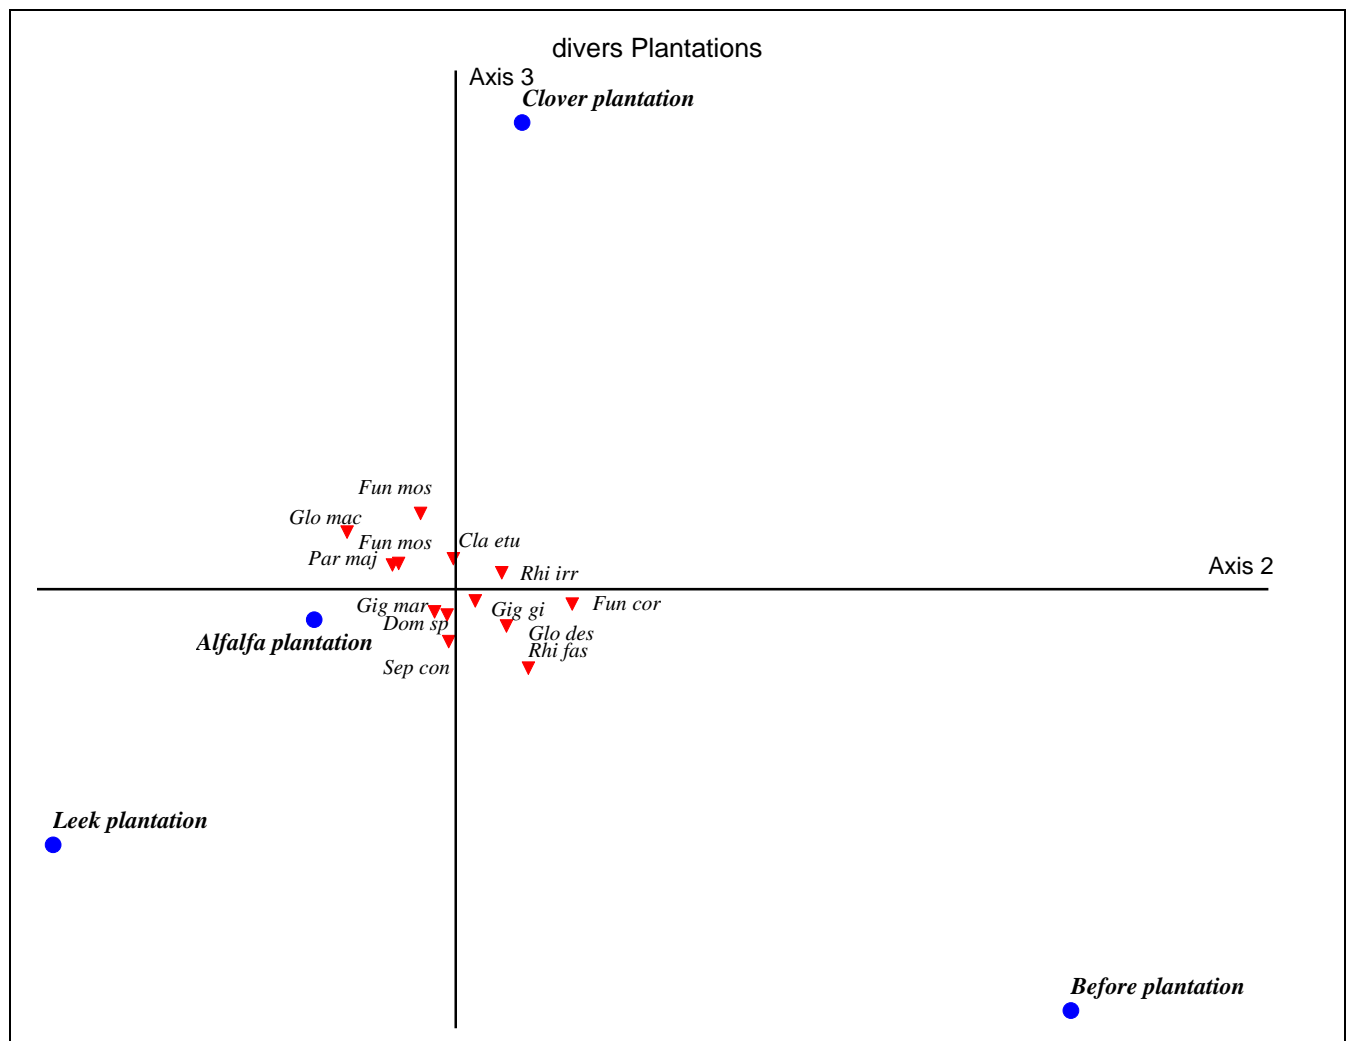

**Figure S2:** Detrended correspondence analysis (DCA) ordination between AMF species and the three studied host plants (alfalfa, clover and leek).

|                                 |               |               |               |               |               |
|---------------------------------|---------------|---------------|---------------|---------------|---------------|
| Alfalfa host plant :<br>15 pots | <b>PA ZA1</b> | <b>PA ZA2</b> | <b>PA ZA3</b> | <b>PAZA4</b>  | <b>PA ZA5</b> |
|                                 | <b>PA SR1</b> | <b>PA SR2</b> | <b>PA SR</b>  | <b>PA SR4</b> | <b>PA SR5</b> |
|                                 | <b>PA BG1</b> | <b>PA BG2</b> | <b>PA BG3</b> | <b>PABG4</b>  | <b>PA BG5</b> |

  

|                                |               |               |               |               |               |
|--------------------------------|---------------|---------------|---------------|---------------|---------------|
| Clover host plant :<br>15 pots | <b>PC ZA1</b> | <b>PC ZA2</b> | <b>PC ZA3</b> | <b>PC ZA4</b> | <b>PC ZA5</b> |
|                                | <b>PC SR1</b> | <b>PC SR2</b> | <b>PC SR3</b> | <b>PC SR4</b> | <b>PC SR5</b> |
|                                | <b>PC BG1</b> | <b>PC BG2</b> | <b>PC BG3</b> | <b>PC BG4</b> | <b>PC BG5</b> |

  

|                              |                |                |                |                |                |
|------------------------------|----------------|----------------|----------------|----------------|----------------|
| Leek host plant : 15<br>pots | <b>PLE ZA1</b> | <b>PLE ZA2</b> | <b>PLE ZA3</b> | <b>PLE ZA4</b> | <b>PLE ZA5</b> |
|                              | <b>PL SR1</b>  | <b>PL SR2</b>  | <b>PL SR3</b>  | <b>PL SR4</b>  | <b>PL SR5</b>  |
|                              | <b>PLE BG5</b> | <b>PLE BG2</b> | <b>PLE BG3</b> | <b>PLE BG4</b> | <b>PLE BG5</b> |

**Figure S3:** Experimental design of trap cultures with the three studied saline soils (ZA: Zaafrane, SR: Salt rocket; BG: Boughzoul) with the three host plants: alfalfa, clover and leek. (PA: alfalfa plant; PC: Clover plant, PLE: leek plant).
